# Supplementary material for: Enhanced high-voltage cycling stability of Ni-rich cathode materials via the self-assembly of Mn-rich shells
Source: Royal Society of Chemistry journal article supplement (doi:10.1039/c9ta07147d), 2019-01-01
Supplement: c9ta07147d1.pdf [file c9ta07147d1.pdf]

## Electronic Supplementary Information

### Enhanced High-voltage Cycling Stability of Ni-rich Cathode Materials via Self-assembly of Mn-rich Shells

Xinyu Dong,<sup>a, b, #</sup> Junyi Yao,<sup>a, b, #</sup> Wenchang Zhu,<sup>a, b</sup> Xue Huang,<sup>a, b</sup> Xiaoxiao Kuai,<sup>a, b</sup> Jing Tang,<sup>c, \*</sup> Xiaolong Li,<sup>d</sup> Shuyan Dai,<sup>a, b</sup> Liwei Shen,<sup>a, b</sup> Ruizhi Yang,<sup>a, b</sup> Lijun Gao,<sup>a, b, \*</sup> Jianqing Zhao<sup>a, b, \*</sup>

<sup>a</sup> College of Energy, Soochow Institute for Energy and Materials InnovationS, Soochow University, Suzhou 215006, China

<sup>b</sup> Key Laboratory of Advanced Carbon Materials and Wearable Energy Technologies of Jiangsu Province, Soochow University, Suzhou 215006, China

<sup>c</sup> School of Chemistry and Molecular Engineering, Shanghai Key Laboratory of Green Chemistry and Chemical Processes, East China Normal University, Shanghai 20062, China

<sup>d</sup> Shanghai Advanced Research Institute, Chinese Academy of Sciences, Shanghai 201204, China

<sup>#</sup> These two authors equally contribute to this work.

Corresponding authors:

Prof. Jianqing Zhao, Email: jqzhao@suda.edu.cn

Prof. Lijun Gao, Email: gaolijun@suda.edu.cn

Prof. Jing Tang, Email: jingtang@chem.ecnu.edu.cn

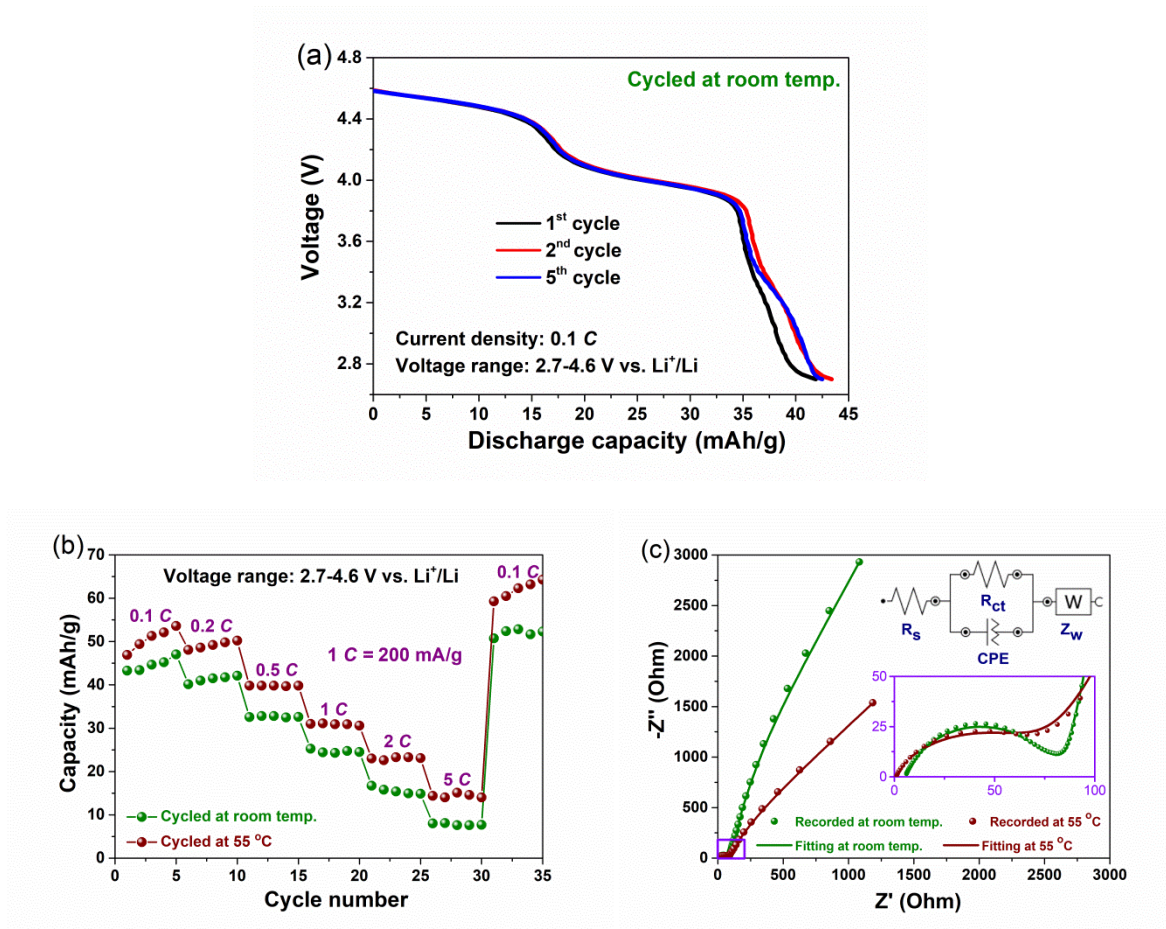

**Figure S1.** Electrochemical performance of the  $\text{Li}_{0.65}\text{Mn}_{0.59}\text{Ni}_{0.12}\text{Co}_{0.13}\text{O}_8$  (mark as LMNCO) material as a cathode material in a voltage range of 2.7-4.6 V vs.  $\text{Li}^+/\text{Li}$ : (a) discharge curves in the 1<sup>st</sup>, 2<sup>nd</sup>, and 5<sup>th</sup> cycles at 0.1 C, and (b) high-rate performance up to 5 C and (c) EIS spectra with fitting profiles based on the equivalent circuit as the inset at room temperature and 55 °C.

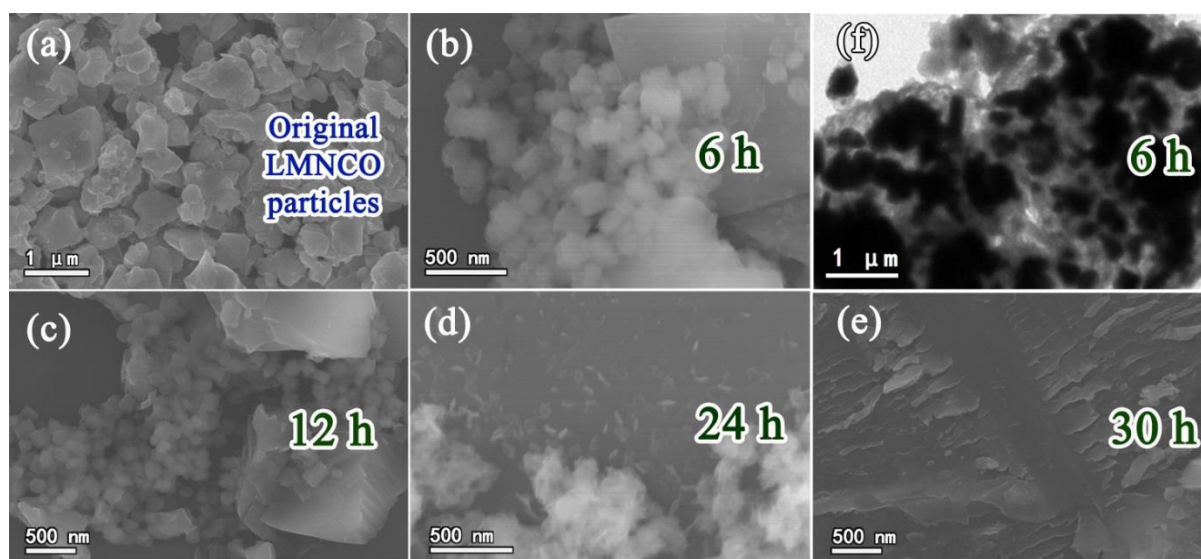

**Figure S2.** Time-resolved effects of the high-energy sonofragmentation on tailoring morphology and structure of the LMNCO material: SEM images showing distinct morphologic changes of the LMNCO material subjected to different sonication hours for (a) 0 h, *i.e.*, original LMNCO particles, (b) 6 h, (c) 12 h, (d) 24 h and (e) 30 h (marked as LMNCO-nh, respectively), and TEM image of (f) LMNCO-6h.

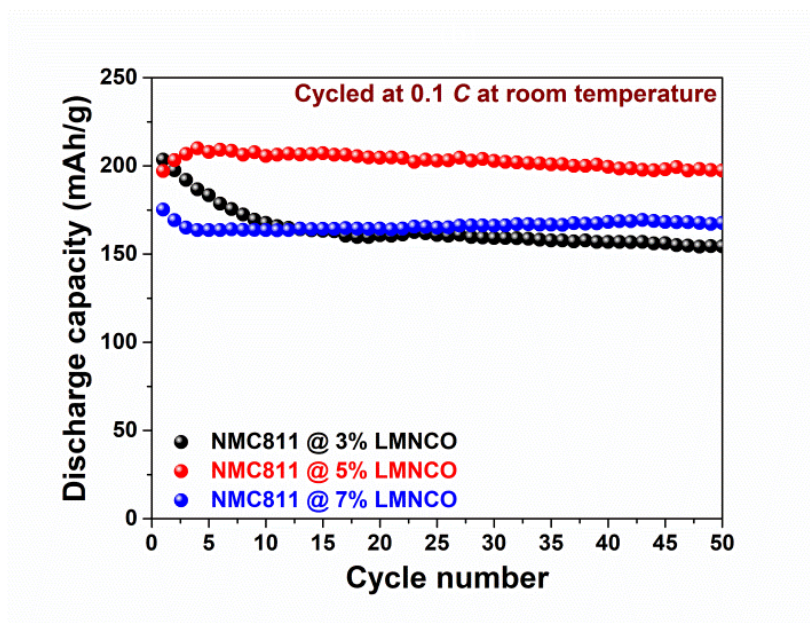

**Figure S3.** Comparative cycling performance of finalized NMC811@3% LMNCO, NMC811@5% LMNCO and NMC811@7% LMNCO cathode materials at 0.1 C in a voltage range of 2.7-4.6 V vs. Li<sup>+</sup>/Li at room temperature.

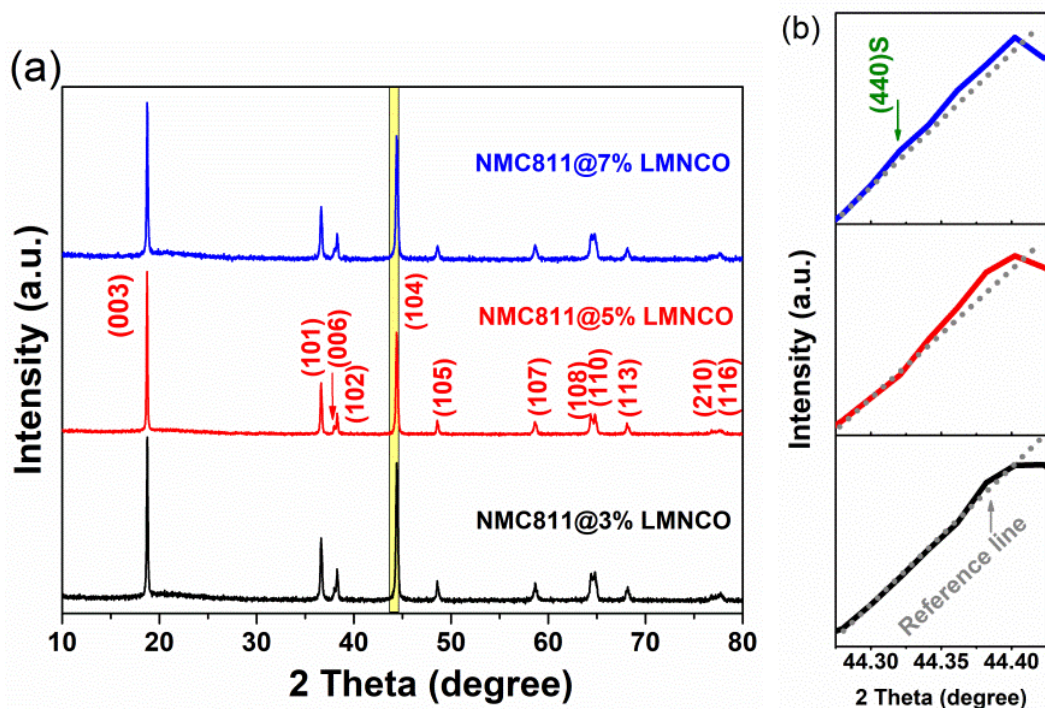

**Figure S4.** (a) XRD patterns of NMC811@3% LMNCO, NMC811@5% LMNCO and NMC811@7% LMNCO intermediates, and (b) an enlarged selected XRD portion at  $2\theta=44-45^\circ$  highlighted in yellow in Figure S4a.

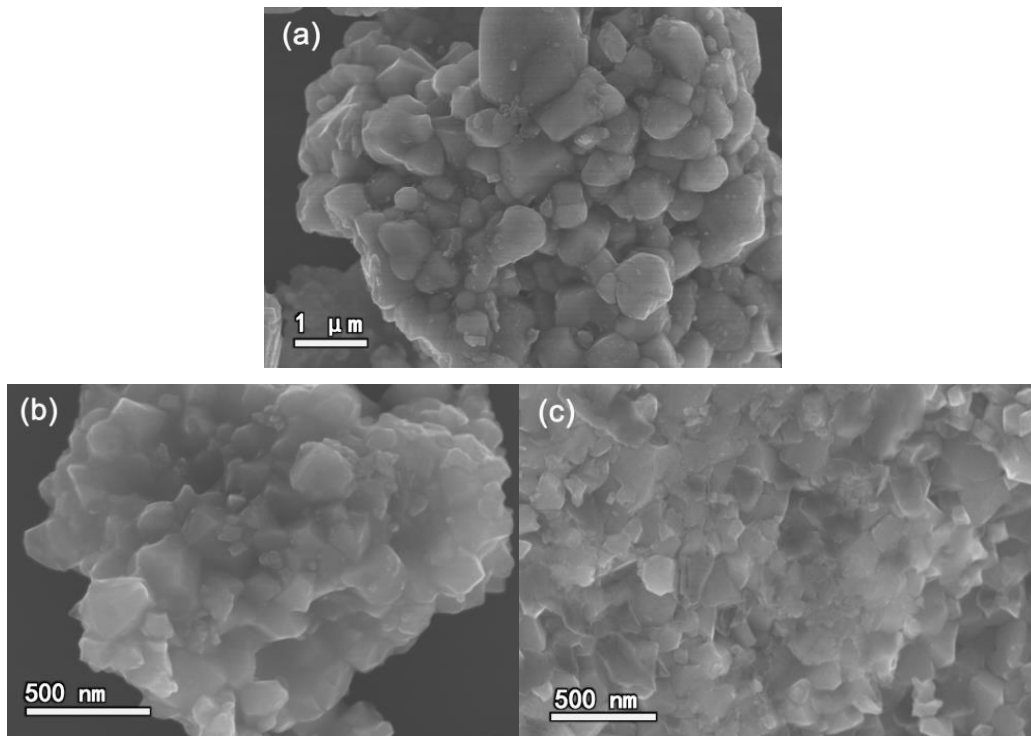

**Figure S5.** SEM images of (a) NMC811@3% LMNCO, (b) NMC811@5% LMNCO and (c) NMC811@7% LMNCO materials.



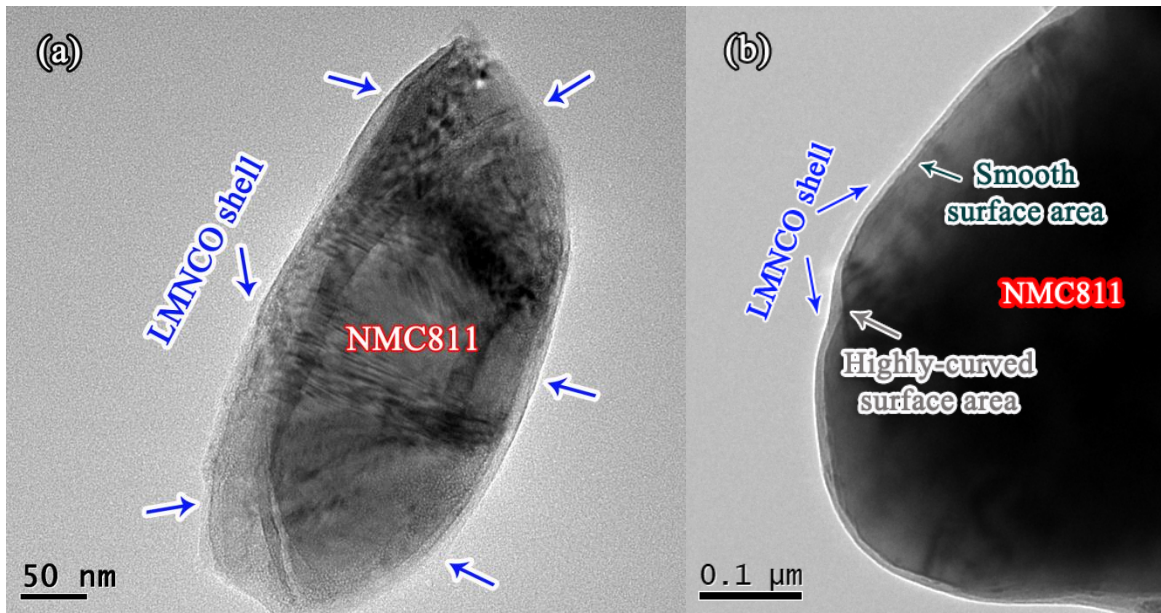

**Figure S6.** TEM images of the NMC811@5% LMNCO intermediate captured from different particles with (a) nano size and (b) micron size.

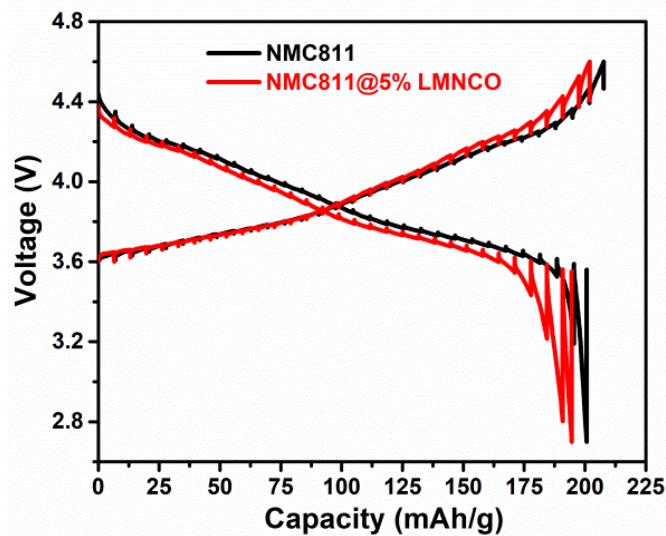

**Figure S7.** GITT curves of the bare NMC811 and core-shell-structured NMC811@5% LMNCO cathodes after the cells were first cycled at 0.1 C for 3 cycles in a voltage range of 2.7-4.6 V vs.  $\text{Li}^+/\text{Li}$ . For the GITT measurement, the cell was first charged from open circuit voltage (OCV) at a  $\tau=20$  min with current pulse of 0.1 C, followed by a relaxation time of 60 min to allow the system to reach electrochemical equilibrium.



**Table S1.** Cycling stabilities of various cathode materials cycled at elevated working temperatures.

| Cathode materials<br>(Operation conditions)                                                                                              | Initial<br>Capacity<br>(mAh g <sup>-1</sup> ) | Capacity<br>(retention)<br>After 50 cycles | Capacity<br>(retention)<br>After 100 cycles | Capacity<br>(retention)<br>After 200 cycles | Reference        |
|------------------------------------------------------------------------------------------------------------------------------------------|-----------------------------------------------|--------------------------------------------|---------------------------------------------|---------------------------------------------|------------------|
| <b>NMC811@5% LMNCO</b><br>(2.7-4.6 V, 1C=200 mA g <sup>-1</sup> , 55 °C)                                                                 | <b>195.7</b>                                  | <b>179.3</b><br>(91.6 %)                   | <b>175.1</b><br>(89.5 %)                    | <b>173.1</b><br>(88.5 %)                    | <b>This work</b> |
| <b>NMC811</b><br>(2.7-4.6 V, 1C=200 mA g <sup>-1</sup> , 55 °C)                                                                          | <b>208.6</b>                                  | <b>158.1</b><br>(75.8 %)                   | <b>148.0</b><br>(70.95 %)                   | <b>140.7</b><br>(67.5 %)                    | <b>This work</b> |
| <b>NMC811</b><br>(2.7-4.4 V, 1C=200 mA g <sup>-1</sup> , 55 °C) <sup>1</sup>                                                             | <b>209.0</b>                                  | <b>140.03</b><br>(67 %)                    | --                                          | --                                          | <b>Ref. S1</b>   |
| <b>NMC811</b><br>(3.0-4.3 V, 1C=180 mA g <sup>-1</sup> , 60 °C) <sup>2</sup>                                                             | <b>205.0</b>                                  | <b>132.4</b><br>(64.6 %)                   | --                                          | --                                          | <b>Ref. S2</b>   |
| <b>LiNi<sub>0.8</sub>Co<sub>0.15</sub>Al<sub>0.05</sub>O<sub>2</sub></b><br>(2.8-4.3 V, 2C=360 mA g <sup>-1</sup> , 55 °C) <sup>3</sup>  | <b>196.8</b>                                  | --                                         | <b>132.0</b><br>(67.1 %)                    | --                                          | <b>Ref. S3</b>   |
| <b>LiNi<sub>0.62</sub>Co<sub>0.14</sub>Mn<sub>0.14</sub>O<sub>2</sub></b><br>(2.7-4.5 V, 1C=180 mA g <sup>-1</sup> , 60 °C) <sup>4</sup> | <b>206.0</b>                                  | --                                         | <b>129</b><br>(62.6 %)                      | --                                          | <b>Ref. S4</b>   |
| <b>LiNi<sub>0.6</sub>Co<sub>0.2</sub>Mn<sub>0.2</sub>O<sub>2</sub></b><br>(2.7-4.3 V, 1C=180 mA g <sup>-1</sup> , 60 °C) <sup>5</sup>    | <b>175.0</b>                                  | <b>144.7</b><br>(82.6 %)                   | --                                          | --                                          | <b>Ref. S5</b>   |
| <b>LiNi<sub>0.5</sub>Mn<sub>1.5</sub>O<sub>4</sub></b><br>(2.7-4.9 V, 0.5C=60 mA g <sup>-1</sup> , 55 °C) <sup>6</sup>                   | <b>120.0</b>                                  | --                                         | <b>18.0</b><br>(15 %)                       | --                                          | <b>Ref. S6</b>   |
| <b>LiMn<sub>2</sub>O<sub>4</sub></b><br>(3.5-4.3 V, 0.5C=74 mA g <sup>-1</sup> , 50 °C) <sup>7</sup>                                     | <b>131.0</b>                                  | --                                         | --                                          | <b>108.7</b><br>(83.0 %)                    | <b>Ref. S7</b>   |
| <b>LiMn<sub>2</sub>O<sub>4</sub></b><br>(3.0-4.3 V, 1C=148 mA g <sup>-1</sup> , 55 °C) <sup>8</sup>                                      | <b>130.0</b>                                  | <b>74.0</b><br>(57.0 %)                    | --                                          | --                                          | <b>Ref. S8</b>   |

## References:

- (1) Sun, Y.K.; Myung, B.C.; Prakash, J., High-energy Cathode Material for Long-Life and safe lithium batteries. *Nat. Mater.*, **2019**, 8, 320-324.
- (2) Jang, S. H.; Mun, J.; Kang, D. K.; Yim, T., Effect of Tris(trimethylsilyl) Phosphate Additive on the Electrochemical Performance of Nickel-rich Cathode Materials at High Temperature. *J. Electrochem. Sci. Tech.*, **2017**, 8, 162-168.
- (3) Chen, T.; Li, X.; Wang, H.; Yan, X. X.; Wang, L.; Deng, B. W.; Ge, W. J.; Qu, M. Z., The Effect of Gradient Boracic Polyanion-doping on Structure, Morphology and Cycling Performance of Ni-rich LiNi<sub>0.8</sub>Co<sub>0.15</sub>Al<sub>0.05</sub>O<sub>2</sub> Cathode Material. *J. Power Sources*, **2018**, 374, 1-11.
- (4) Liao, Y.; Manthiram, A.; Surface-modified Concentration-gradient Ni-rich Layered Oxide Cathodes for High-energy Lithium-ion Batteries. *J. Power Sources*, **2015** 282, 429-436.
- (5) Cho, W.; Kim, S.M.; Song, J.H.; Yim, T.; Woo, S.G.; Lee, K.W.; Kim, J.S.; Kim, Y.J., Improved Electrochemical and Thermal Properties of Nickel Rich

$\text{LiNi}_{0.6}\text{Co}_{0.2}\text{Mn}_{0.2}\text{O}_2$  Cathode Materials by  $\text{SiO}_2$  Coating. *J. Power Sources*, **2015**, 282, 45-50.

- (6) Tu, W. Q.; Ye, C. C.; Yang, X. R.; Xing, L. D.; Liao, Y. H.; Liu, X.; Li, W. S., Trimethylsilylcyclopentadiene as a Novel Electrolyte Additive for High Temperature Application of Lithium Nickel Manganese Oxide Cathode. *J. Power Sources*, **2017**, 364, 23-32.
- (7) Shaju, K. M.; Bruce, P. G., A Stoichiometric Nano- $\text{LiMn}_2\text{O}_4$  Spinel Electrode Exhibiting High Power and Stable Cycling. *Chem. Mater.*, **2008**, 20, 5557-5562.
- (8) Wang, J. L.; Li, Z. H.; Yang, J.; Tang, J. J.; Yu, J. J.; Nie, W. B.; Lei, G. T.; Xiao, Q. Z., Effect of Al-doping on the Electrochemical Properties of a Three-dimensionally Porous Lithium Manganese Oxide for Lithium-ion Batteries. *Electrochim. Acta*, **2012**, 75, 115-122.
